# Supplementary material for: Insights into Early-Pregnancy Mechanisms: Mast Cells and Chymase CMA1 Shape the Phenotype and Modulate the Functionality of Human Trophoblast Cells, Vascular Smooth-Muscle Cells and Endothelial Cells
Source: MDPI journal article supplement (doi:10.3390/cells11071158), 2022-03-29
Supplement: s1 [file s1]

## SUPPLEMENTARY INFORMATION

# Insights into early pregnancy mechanisms: mast cells and chymases CMA1 shape the phenotype and modulate the functionality of human trophoblast cells, vascular smooth muscle cells and endothelial cells.

Authors: Ningjuan Zhang<sup>1,2</sup>, Anne Schumacher<sup>1,2</sup>, Beate Fink<sup>1</sup>, Mario Bauer<sup>1</sup>, Ana Claudia Zenclussen<sup>1,2</sup> and Nicole Meyer<sup>1,2</sup>

Ningjuan Zhang <sup>1,2</sup>, Anne Schumacher <sup>1,2</sup>, Beate Fink <sup>1</sup>, Mario Bauer <sup>1</sup>, Ana Claudia Zenclussen <sup>1,2</sup> and Nicole Meyer <sup>1,2,\*</sup>

- <sup>1</sup> Department of Environmental Immunology, UFZ-Helmholtz Centre for Environmental Research Leipzig-Halle, 04318 Leipzig, Germany; ningjuan.zhang@ufz.de (N.Z.); anne.schumacher@ufz.de (A.S.); beate.fink@ufz.de (B.F.); mario.bauer@ufz.de (M.B.); ana.zenclussen@ufz.de (A.C.Z.)
- <sup>2</sup> Perinatal Immunology, Saxonian Incubator for Clinical Translation (SIKT), Medical Faculty, University Leipzig, 04103 Leipzig, Germany
- \* Correspondence: nicole.meyer@ufz.de; Tel.: +49-341-235-1542

**Fig. S1**

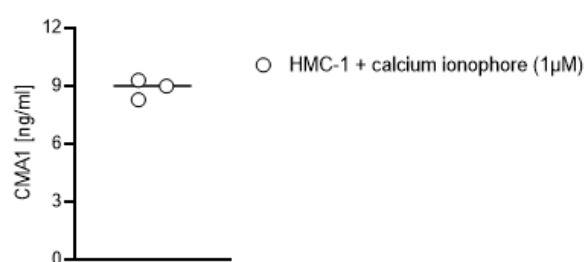

**Figure S1: CMA1 expression of calcium ionophore A23187-treated HMC-1 cells.** CMA1 expression (ng/ml) measured via ELISA in the supernatants of calcium ionophore A123187-treated HMC-1 cells.

**Fig. S2**

a) HTR-8 cell population

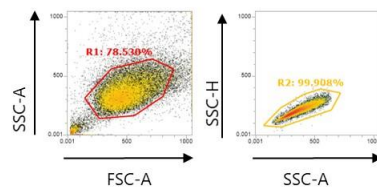

b) FMO

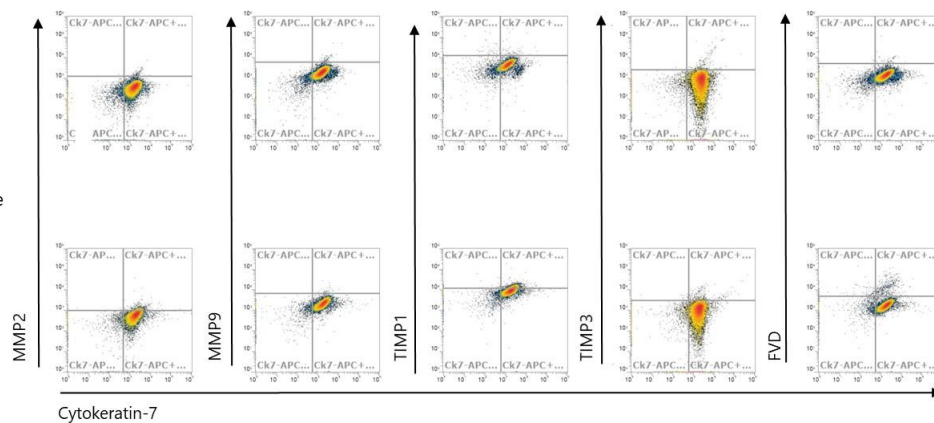

c) Sample

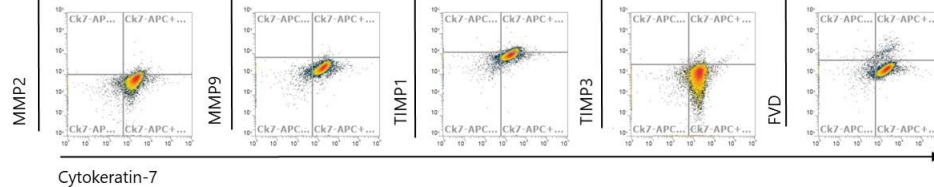

**Figure S2: Flow cytometry gating strategy: HTR-8 ± HMC-1 assay.** a) Representative gating strategy for HTR-8 cell population. b) Representative Fluorescence minus one (FMO) control or c) sample plots for MMP2, MMP9, TIMP1, TIMP3 or FVD of HTR-8 cells. HTR-8: HTR-8/SVneo cells; FMO; Fluorescence Minus One.

**Fig. S3**

a) HTR-8 cell population

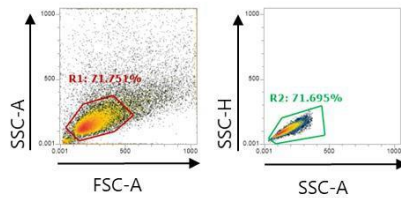

b) FMO

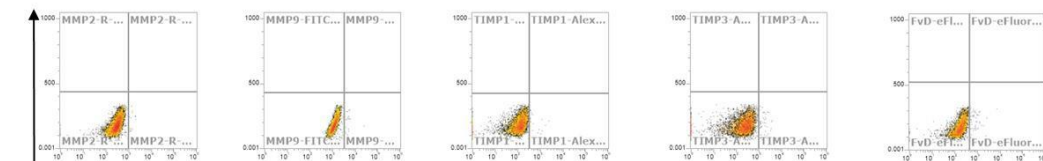

c) Sample

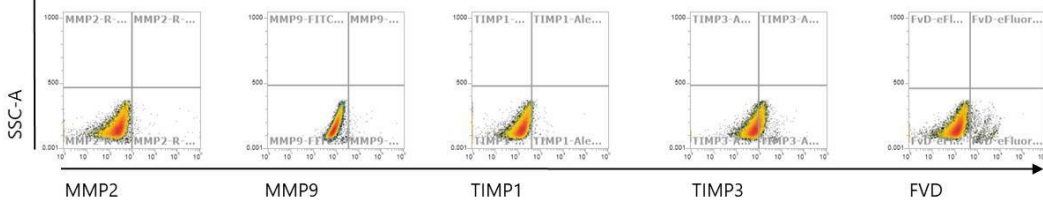

**Figure S3: Flow cytometry gating strategy: HTR-8  $\pm$  rhuCMA1 assay.** **a)** Representative gating strategy for HTR-8 cell population. **b)** Representative FMO control or **c)** sample plots for MMP2, MMP9, TIMP1, TIMP3 or FVD of HTR-8 cells stimulated  $\pm$  rhuCMA1. HTR-8: HTR-8/SVneo cells; rhuCMA1: recombinant human chymase; FMO; Fluorescence Minus One.

Tab. S1

Table S1: MMPs and TIMPs expression in supernatant of HTR-8 cells co-cultured with HMC-1 or treated with rhuCMA1

| Median (95%CI) (pg/ml)                | TIMP1                  | TIMP2                 | MMP2 | MMP9 |
|---------------------------------------|------------------------|-----------------------|------|------|
| HTR-8+HMC-1 co-culture experiment 24h |                        |                       |      |      |
| HTR-8                                 | 7313 (5503,7767)       | n.d.                  | n.d. | n.d. |
| HTR-8+HMC-1 (1:1)                     | 13674 (9005,18731)     |                       |      |      |
| HTR-8+HMC-1 (1:5)                     | 20403 (17937,20924) ** |                       |      |      |
| HTR-8+rhuCMA1 experiment 24h          |                        |                       |      |      |
| HTR-8                                 | 11049 (8497,13737)     | 13238 (7805,18671)    | n.d. | n.d. |
| HTR-8+rhuCMA1 (3ng/ml)                | 10864 (7688,13574)     | 3216                  |      |      |
| HTR-8+rhuCMA1 (30ng/ml)               | 10902 (6953,13330)     | 12446 (6222,18671)    |      |      |
| HTR-8+rhuCMA1 (300ng/ml)              | 11666 (9911,12213)     | 5453 (1740,7805)      |      |      |
| HTR-8+HMC-1 co-culture experiment 48h |                        |                       |      |      |
| HTR-8                                 | 16751 (15959,17792)    | n.d.                  | n.d. | n.d. |
| HTR-8+HMC-1 (1:1)                     | 23235 (22960,23617)    |                       |      |      |
| HTR-8+HMC-1 (1:5)                     | 22686 (20487,25317)    |                       |      |      |
| HTR-8+rhuCMA1 experiment 48h          |                        |                       |      |      |
| HTR-8                                 | 15156 (11125,25767)    | 12934 (1740,14777)    | n.d. | n.d. |
| HTR-8+rhuCMA1 (3ng/ml)                | 15081 (9761,21313)     | 11158 (8619,12038)    |      |      |
| HTR-8+rhuCMA1 (30ng/ml)               | 12540 (11279,24969)    | 7805 (7006,8619)      |      |      |
| HTR-8+rhuCMA1 (300ng/ml)              | 13825 (10515,29370)    | n.d.                  |      |      |
| HTR-8+HMC-1 co-culture experiment 72h |                        |                       |      |      |
| HTR-8                                 | 34065 (24455,50822)    | n.d.                  | n.d. | n.d. |
| HTR-8+HMC-1 (1:1)                     | 38357 (29390,55236)    |                       |      |      |
| HTR-8+HMC-1 (1:5)                     | 27160 (24969,44776)    |                       |      |      |
| HTR-8+rhuCMA1 experiment 72h          |                        |                       |      |      |
| HTR-8                                 | 24352 (21280,30972)    | 32835 (16829,53159)   | n.d. | n.d. |
| HTR-8+rhuCMA1 (3ng/ml)                | 24591 (23323,27159)    | 35269 (22821,51336)   |      |      |
| HTR-8+rhuCMA1 (30ng/ml)               | 21080 (16553,33073)    | 45556 (29635,50729)   |      |      |
| HTR-8+rhuCMA1 (300ng/ml)              | 25485 (22471,27420)    | 47862 (29817,60014) * |      |      |
